# Supplementary material for: Utility of far-field effects from tip-assisted Raman spectroscopy for the detection of a monolayer of diblock copolymer reverse micelles for nanolithography
Source: Royal Society of Chemistry journal article supplement (doi:10.1039/d1cp01399h), 2021-01-01
Supplement: d1cp01399h1.pdf [file d1cp01399h1.pdf]

## Utilizing far field effects of Tip-enhanced Raman spectroscopy to detect a monolayer of diblock copolymer colloidal reverse micelles

Ramis Arbi<sup>a</sup>, Lok Shu Hui <sup>a</sup>, Maria Dittrich<sup>b</sup>, and Ayse Turak<sup>a</sup> \*

<sup>a</sup>Department of Engineering Physics, McMaster University, Hamilton, Ontario, Canada.

<sup>b</sup>Department of Physical and Environmental Sciences, University of Toronto Scarborough, 1265 Military Trail, Toronto, Ontario, Canada

\*Tel: (905)-525-9140 ext. 23348; E-mail: turaka@mcmaster.ca

The following files are available free of charge. The following supplementary details are available free of charge.

- Raman spectra for KBr substrate used for background subtraction.
- Schematic of experimental set-up for the various Raman techniques
- Volume resolution limits of conventional Raman
- Raman spectra for complexated P2VP in PS-P2VP micelles
- Comparative table of measured intensity of PS mode

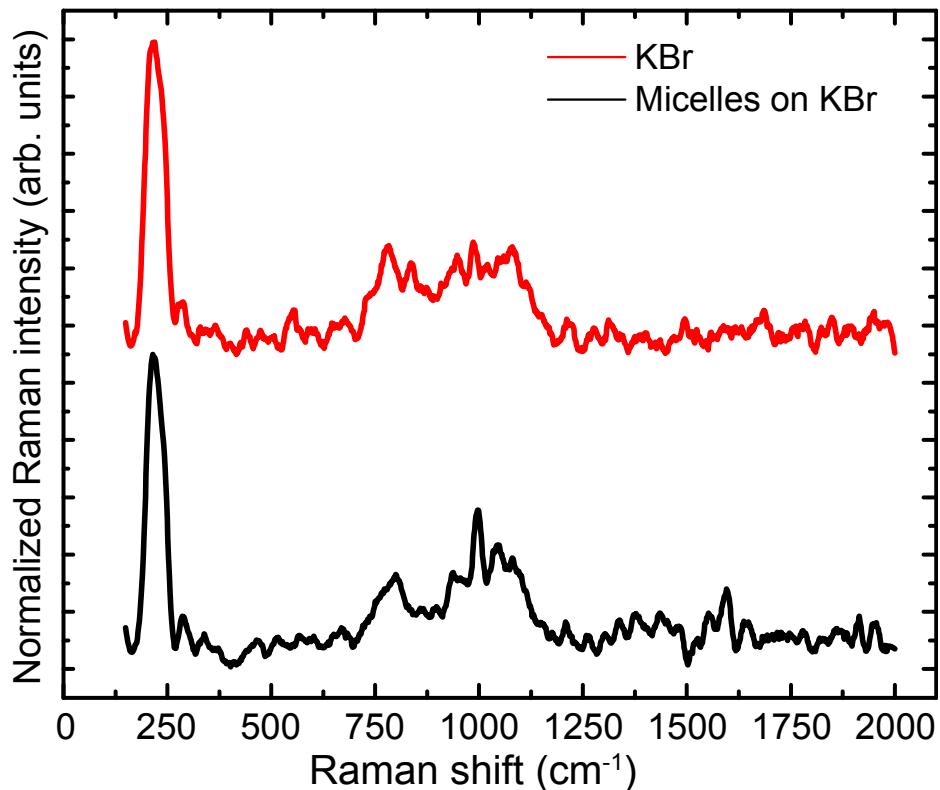

**Figure SI-1** Raman spectra of KBr for background subtraction and unsubtracted P4824 empty micelles coated KBr.

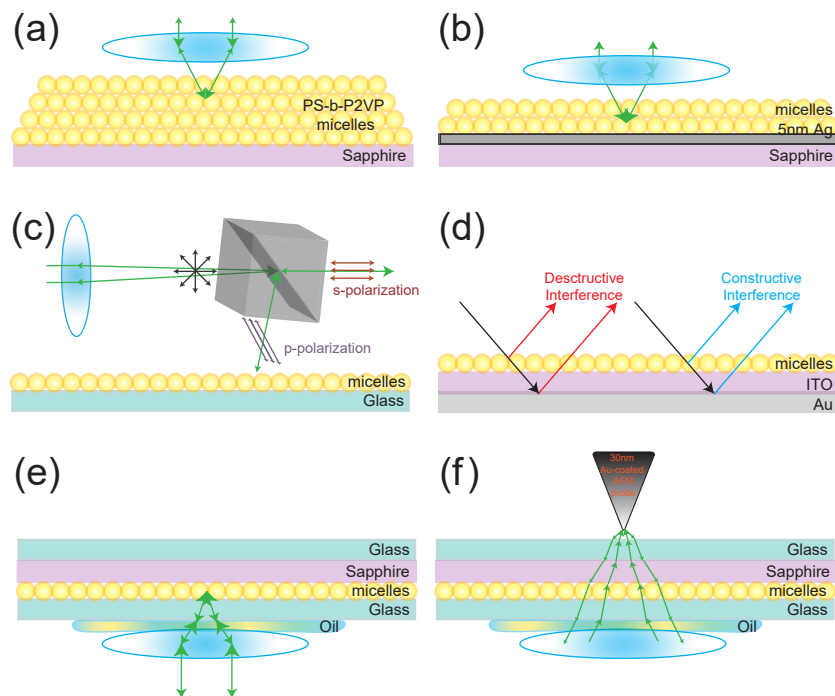

**Figure SI-2** Configurations of various Raman set-ups for (a) normal Raman of thick micelles on Sapphire; (b) SERS of multilayer micelles on 5nm-Ag-coated Sapphire; (c) Polarized Raman with Glenn-Taylor prism of monolayer micelles; (d) IERS of monolayer micelles; (e) Inverted Raman of monolayer micelles and (f) Unconventional TERS of monolayer micelles

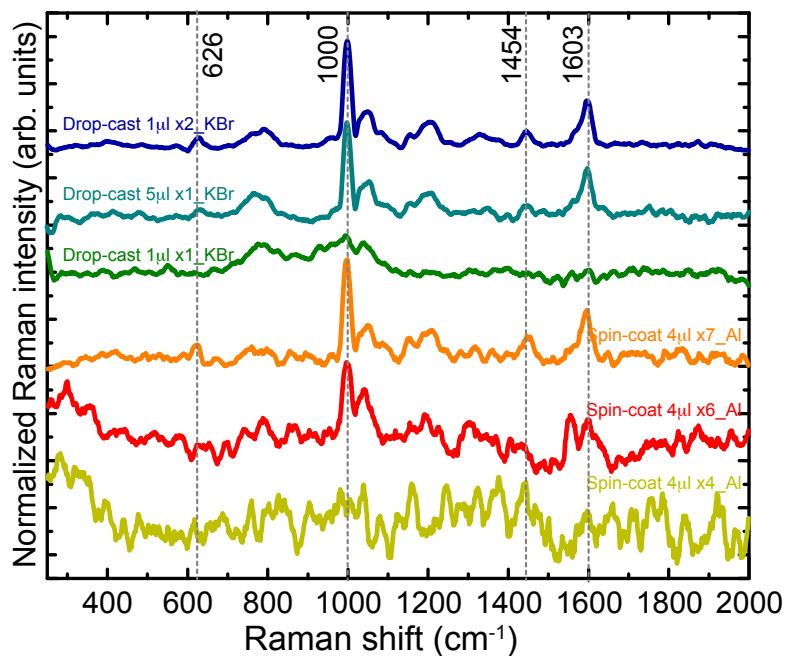

**Figure SI-3** Raman spectra of different amounts of micelles on KBr (dropcast) and Al (spin-coated) substrates

**Table SI-1** Table of signal intensity of the PS ring breathing at  $1000\text{ cm}^{-1}$  obtained from the spectra for each technique.

| Technique          | Intensity of PS ring breathing mode (counts) | Accumulation time (s) | Accumulation normalized intensity (counts/s) | Enhancement vs NR | Thickness of polymer film (nm) | Accumulation and volume normalized intensity (counts/s nm) | Enhancement vs NR |
|--------------------|----------------------------------------------|-----------------------|----------------------------------------------|-------------------|--------------------------------|------------------------------------------------------------|-------------------|
| uc-TARS            | 3406196                                      | 1000                  | 3406.20                                      | 502.39            | 20                             | 170.31                                                     | 3014.33           |
| SERS               | 2261                                         | 100                   | 22.61                                        | 3.33              | 40                             | 0.57                                                       | 10.00             |
| Inverted Raman     | 58098                                        | 200                   | 290.49                                       | 42.85             | 20                             | 14.52                                                      | 257.07            |
| IERS               | 2273                                         | 140                   | 16.24                                        | 2.39              | 20                             | 0.81                                                       | 14.37             |
| Inverted Raman @60 | 4489                                         | 30                    | 149.63                                       | 22.07             | 20                             | 7.48                                                       | 132.42            |
| Inverted Raman @45 | 2423                                         | 30                    | 80.77                                        | 11.91             | 20                             | 4.04                                                       | 71.47             |
| Normal Raman       | 678                                          | 100                   | 6.78                                         | 1.00              | 120                            | 0.06                                                       | 1.00              |

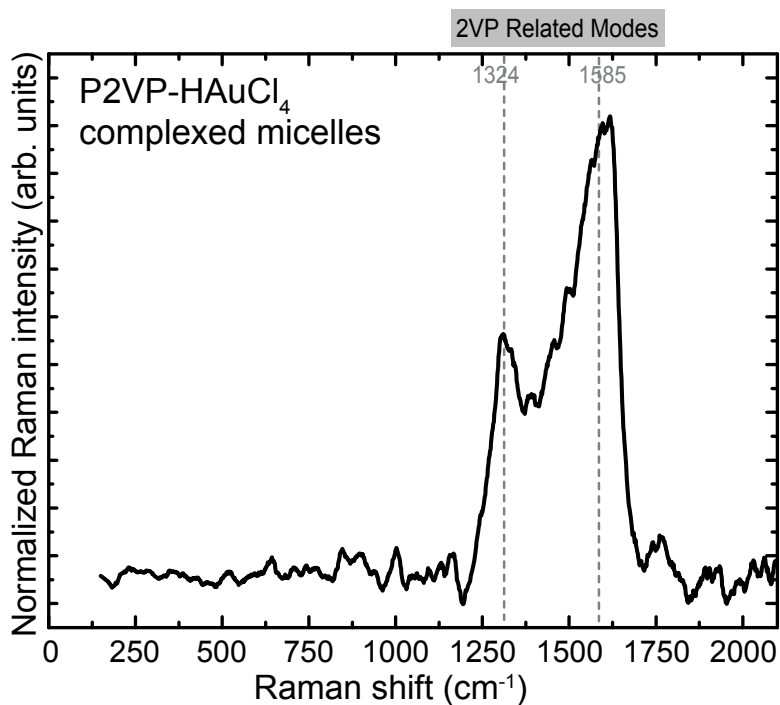

**Figure SI-4** Raman spectra of micelles with complexation of P2VP with Au salt, showing the characteristic peaks associated with metal complexation on pyridine.
